# Supplementary material for: Assessing different imaging velocimetry techniques to measure shallow runoff velocities during rain events using an urban drainage physical model
Source: Copernicus journal article supplement (doi:10.5194/hess-25-885-2021), 2021-02-24
Supplement: Supplementary file 1 [file hess-25-885-2021-supplement.pdf]

Supplement of Hydrol. Earth Syst. Sci., 25, 885–900, 2021  
<https://doi.org/10.5194/hess-25-885-2021-supplement>  
© Author(s) 2021. This work is distributed under  
the Creative Commons Attribution 4.0 License.

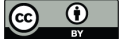

*Supplement of*

**Assessing different imaging velocimetry techniques to measure shallow runoff velocities during rain events using an urban drainage physical model**

**Juan Naves et al.**

*Correspondence to:* Juan Naves ([juan.naves@udc.es](mailto:juan.naves@udc.es))

The copyright of individual parts of the supplement might differ from the CC BY 4.0 License.

## S1. Complementary results for the sensitivity analysis

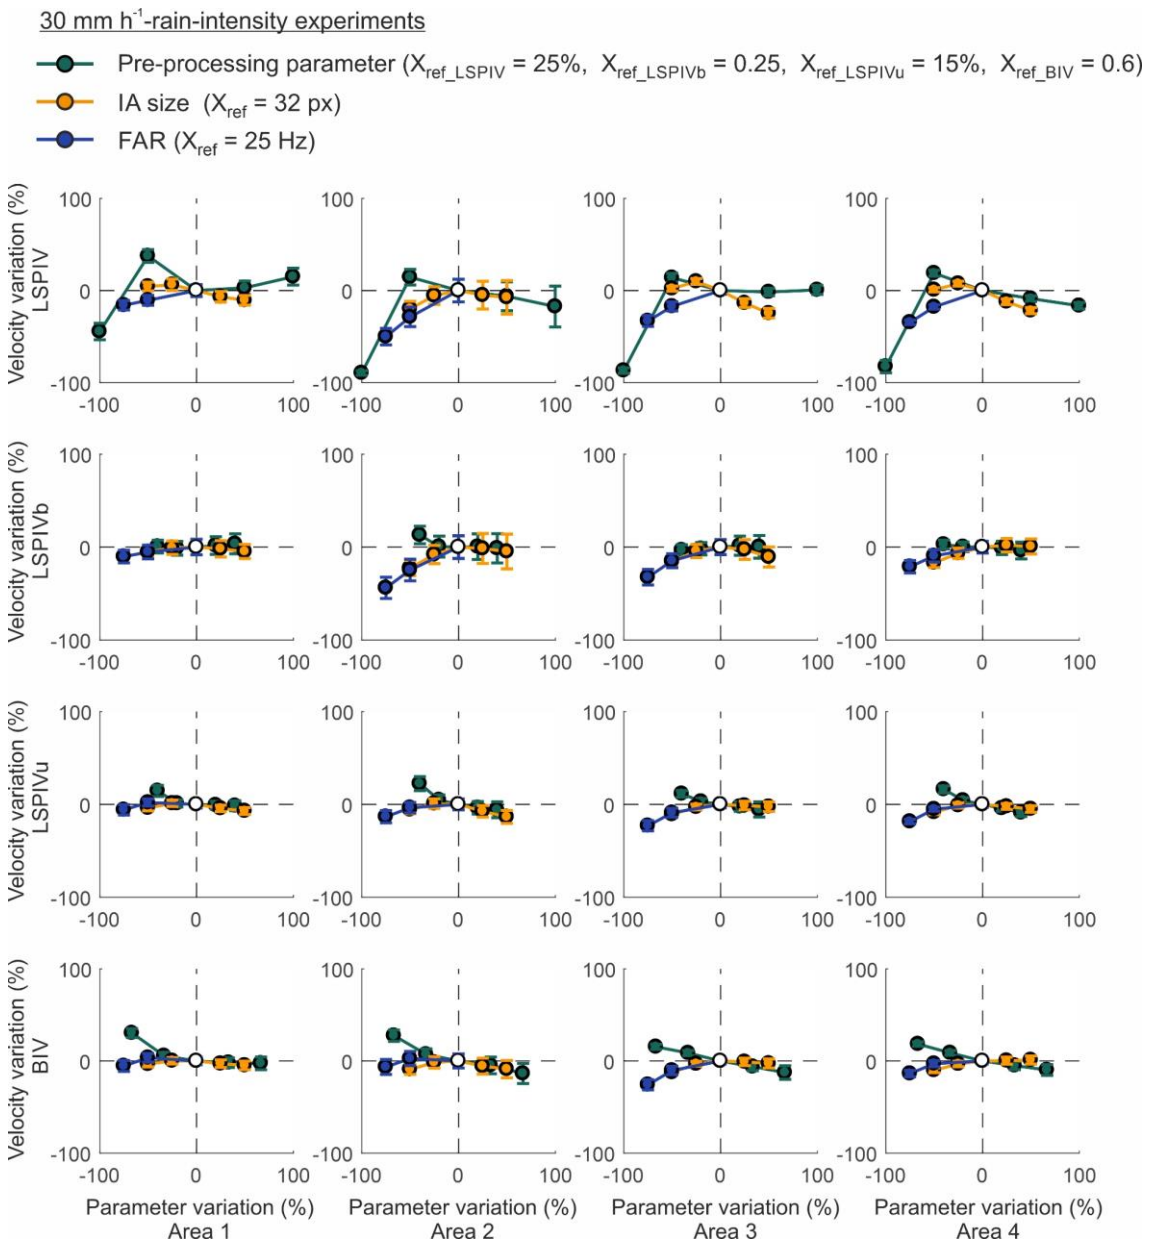

Figure S1: Percentage of variation in the mean velocities when varying parameters of the analysis for the four studied areas (columns) and the four imaging velocimetry techniques considered (rows) in the case of 30 mm h<sup>-1</sup> rainfall. Mean velocity variability for the different pairs of frames analyzed are included using whiskers.

80 mm h<sup>-1</sup>-rain-intensity experiments

- Pre-processing parameter ( $X_{ref\_LSPIV} = 25\%$ ,  $X_{ref\_LSPIVb} = 0.25$ ,  $X_{ref\_LSPIVu} = 15\%$ ,  $X_{ref\_BIV} = 0.6$ )
- IA size ( $X_{ref} = 32$  px)
- FAR ( $X_{ref} = 25$  Hz)

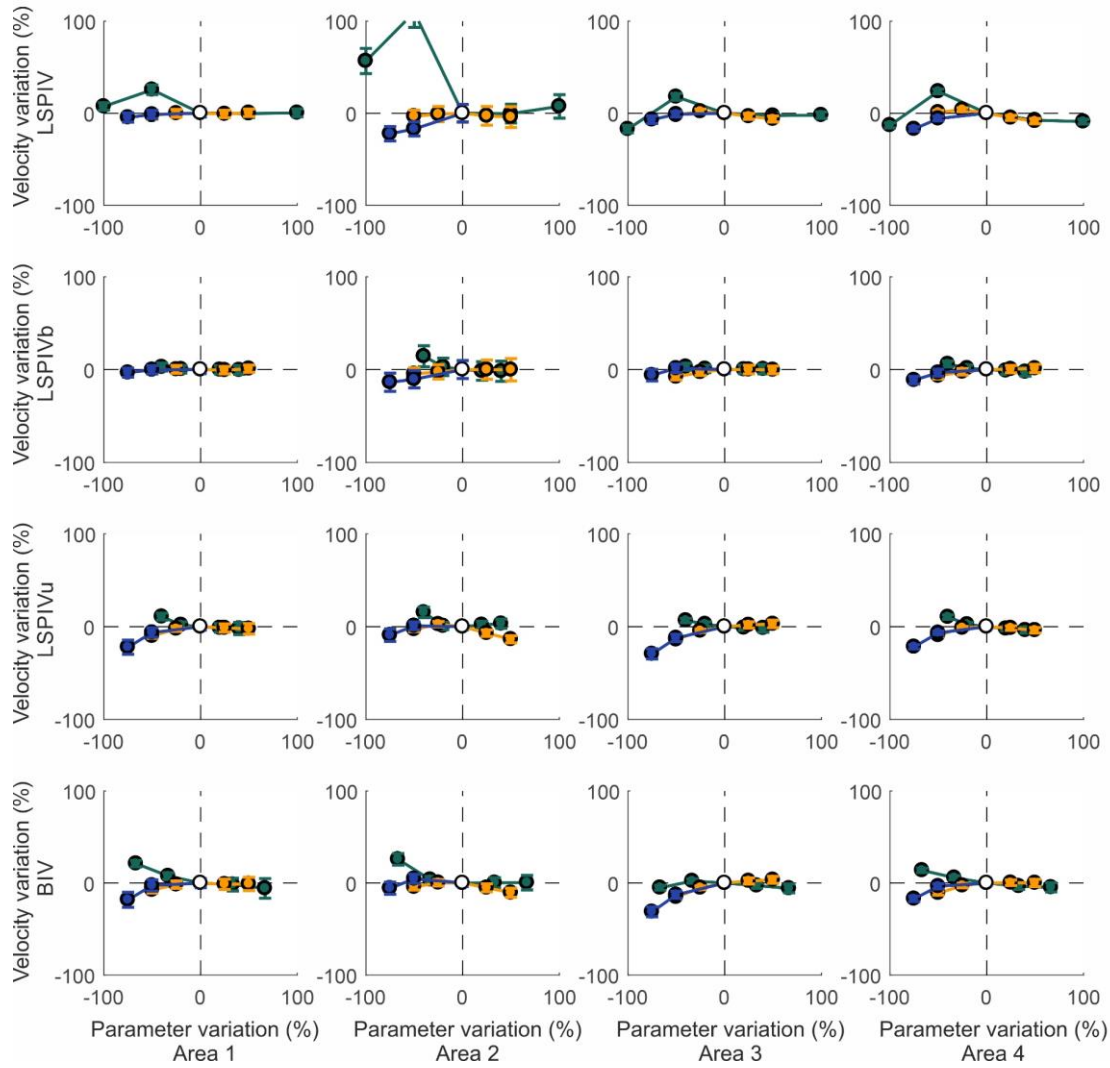

**Figure S2: Percentage of variation in the mean velocities when varying parameters of the analysis for the four studied areas (columns) and the four imaging velocimetry techniques considered (rows) in the case of 80 mm h<sup>-1</sup> rainfall. Mean velocity variability for the different pairs of frames analyzed are included using whiskers.**

## S2. Complementary results for the velocity results comparison

Velocity comparison Area 3

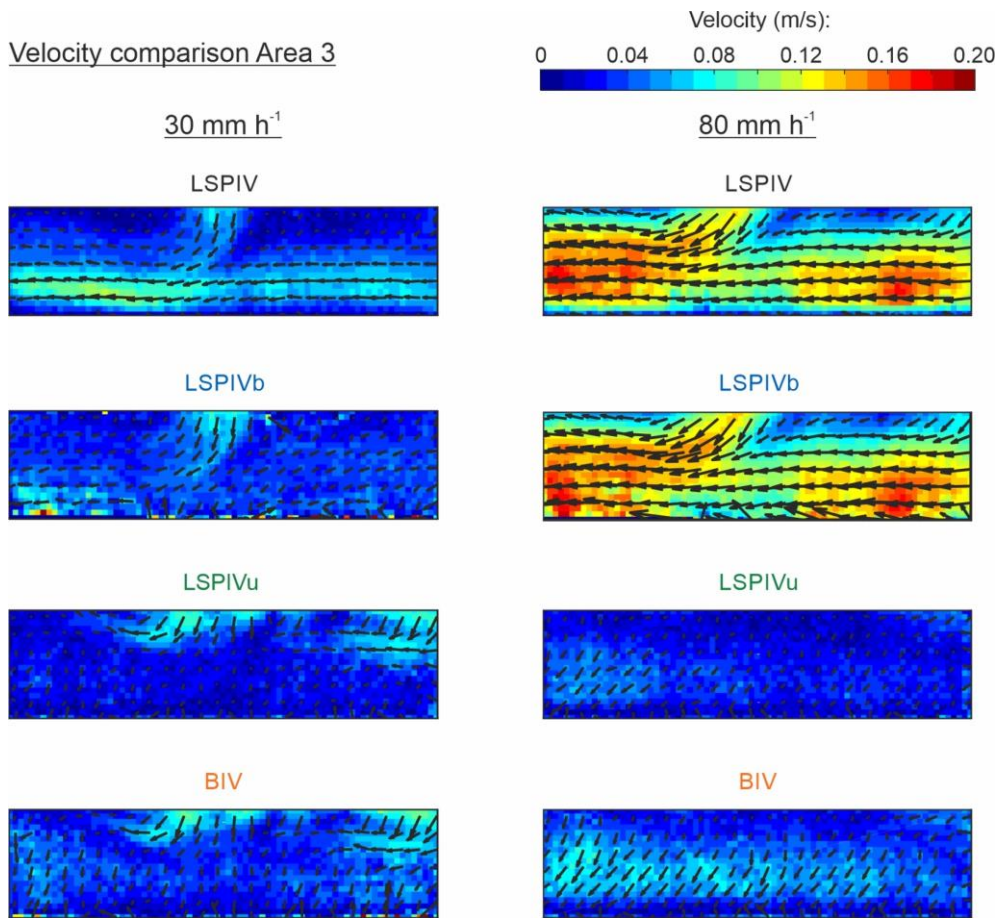

Figure S3: Velocity fields obtained for the cases of 30 mm h<sup>-1</sup> and 80 mm h<sup>-1</sup> in Area 3.

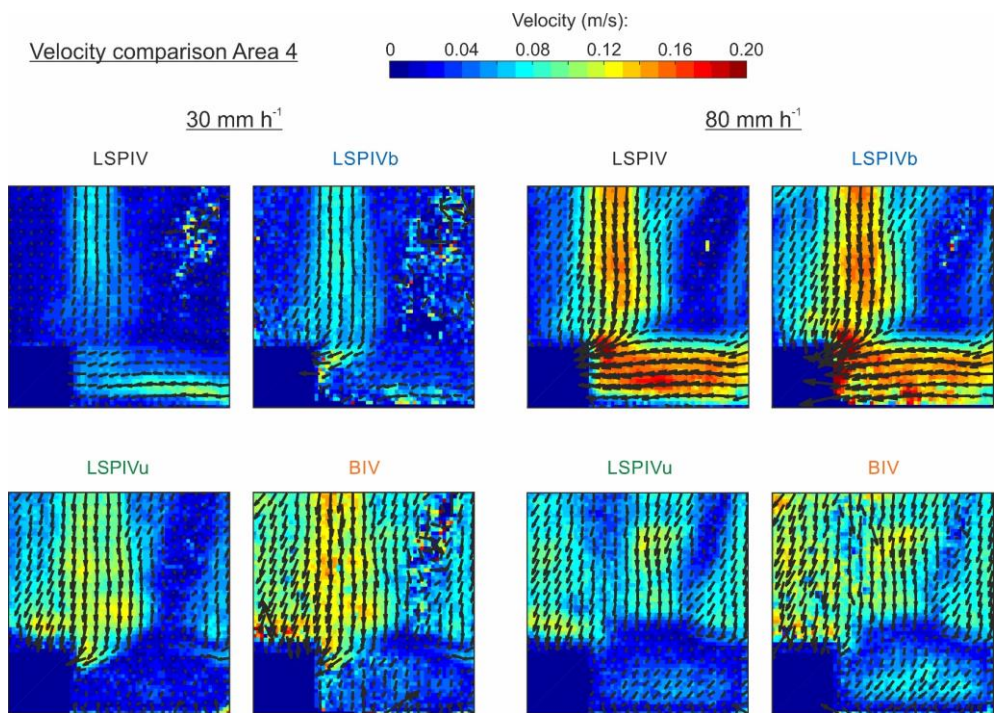

Figure S4: Velocity fields obtained for the cases of 30 mm h<sup>-1</sup> and 80 mm h<sup>-1</sup> in Area 4.

### S3. Complementary results for the convergence study

Convergence study: mean velocities (rain intensity = 30 mm h<sup>-1</sup>)

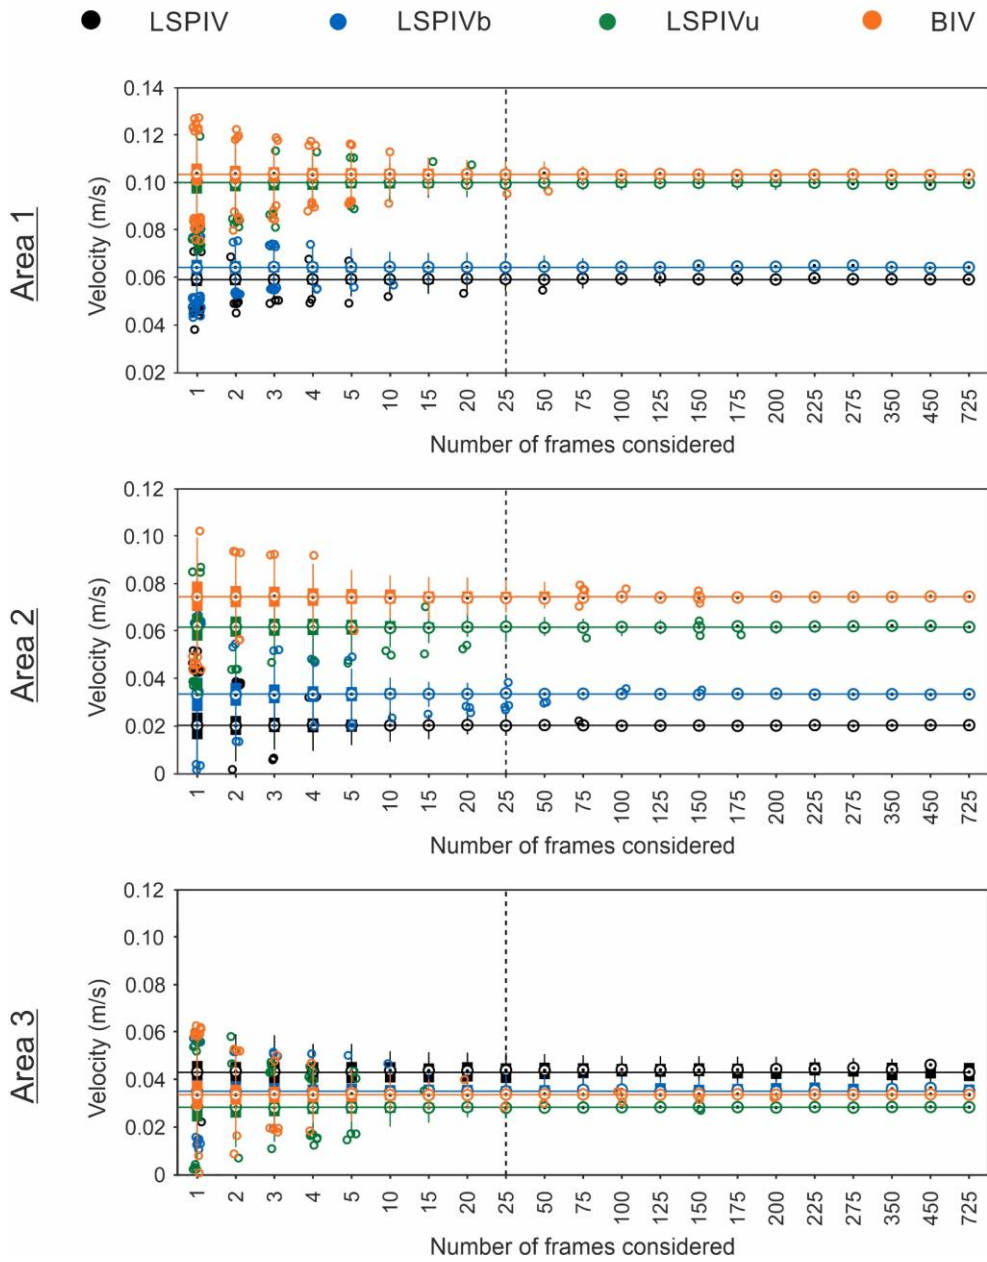

Figure S5: Mean velocity convergence study for rain intensity of 30 mm h<sup>-1</sup> and Areas 1, 2, and 3. The horizontal line represents the mean velocity considering all the frames available (1500) for LSPIV (black), LSPIVb (blue), LSPIVu (green) and BIV (orange) techniques. Then, the variability in the mean velocity when the frames are divided into groups of different numbers of frames was represented by boxplots.

Convergence study: mean velocities (rain intensity = 80 mm h<sup>-1</sup>)

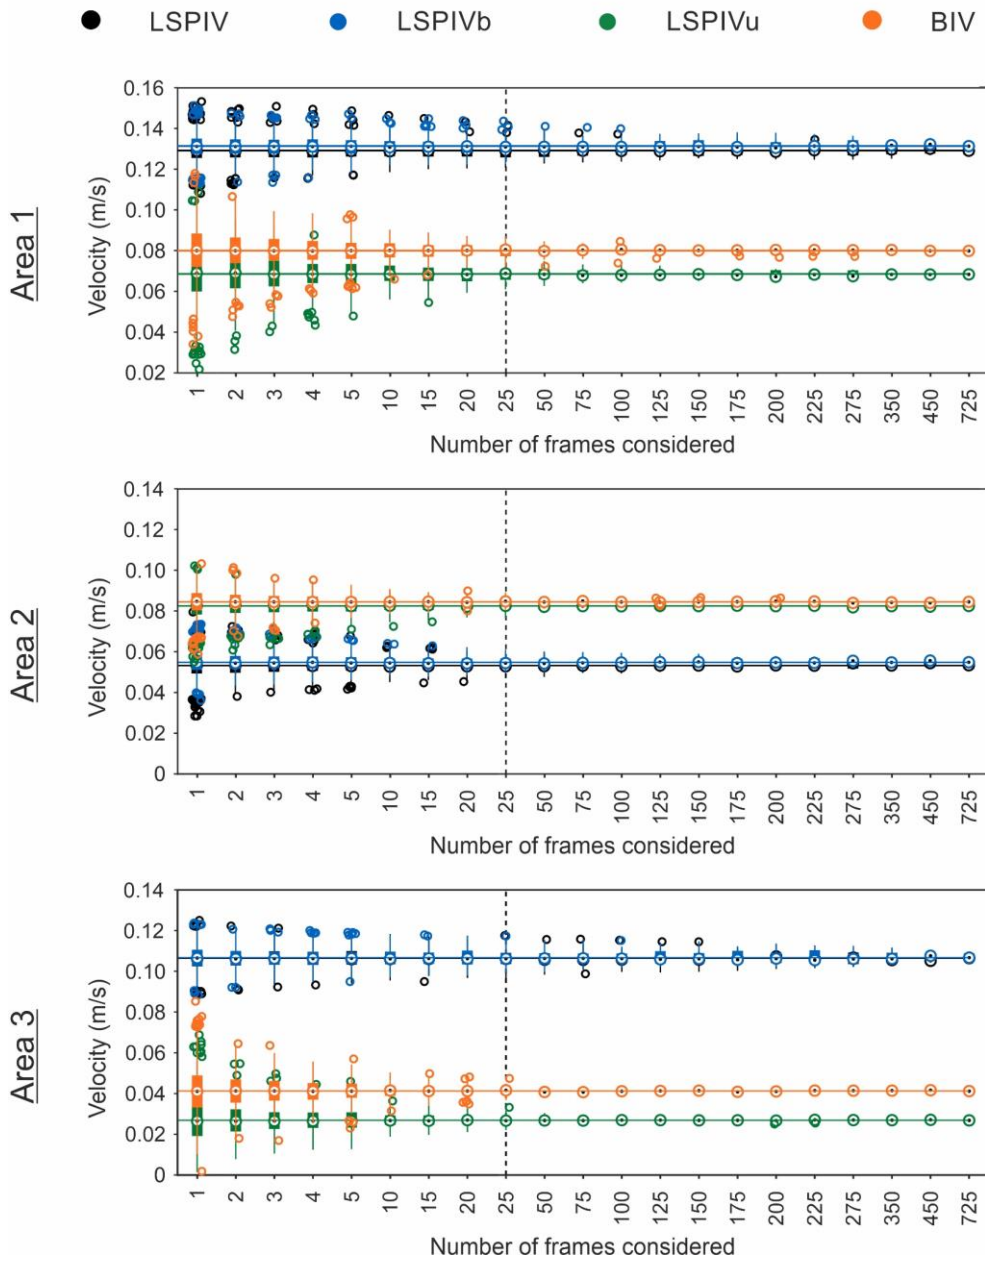

Figure S6: Mean velocity convergence study for rain intensity of 80 mm h<sup>-1</sup> and Areas 1, 2, and 3. The horizontal line represents the mean velocity considering all the frames available (1500) for LSPIV (black), LSPIVb (blue), LSPIVu (green) and BIV (orange) techniques. Then, the variability in the mean velocity when the frames are divided into groups of different numbers of frames was represented by boxplots.

### Convergence study: mean velocities (Area 4)

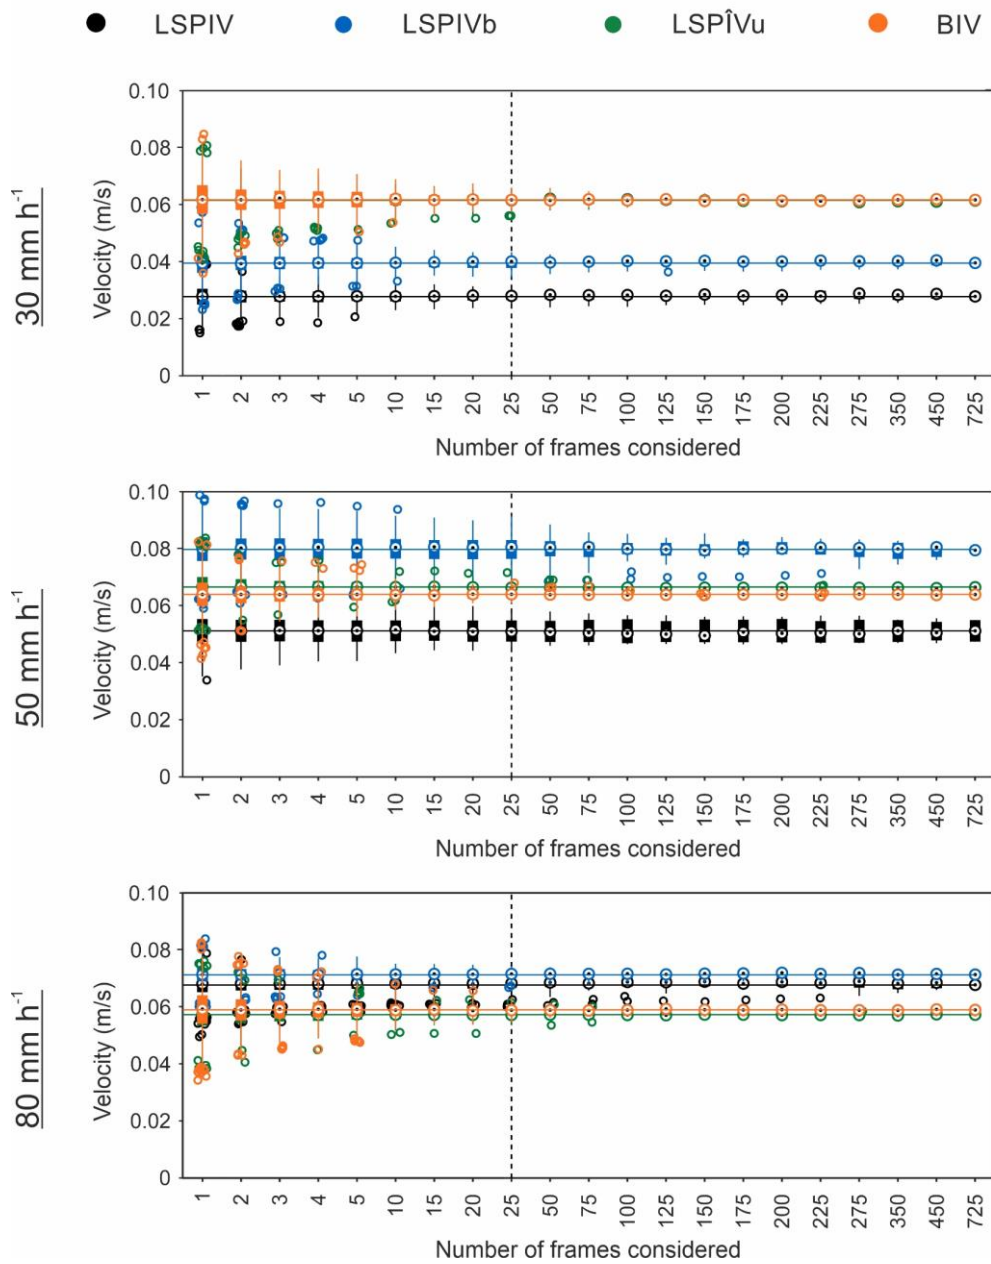

Figure S7. Mean velocity convergence study for Area 4 and rain intensities of 30, 50 and 80 mm h<sup>-1</sup>. The horizontal line represents the mean velocity considering all the frames available (1500) for LSPiV (black), LSPiVb (blue), LSPiVu (green) and BIV (orange) techniques. Then, the variability in the mean velocity when the frames are divided into groups of different numbers of frames was represented by boxplots.
